# Supplementary material
Source: publisher figshare collection journal article supplement (https://acs.figshare.com/ndownloader/files/3773446)
Supplement: Supplementary file 1 [file 3773446]

## Supporting Information

### Enhanced fracture resistance in flexible ZnO:Al thin films *in situ* sputtered on bent polymer substrates

Hong Rak Choi, Senthil Kumar Eswaran, Seung Min Lee and Yong Soo Cho\*

Department of Materials Science and Engineering, Yonsei University, Seoul 120-749, Korea

\*Corresponding author: ycho@yonsei.ac.kr (Y.S.Cho)

### **Calculation of fracture energy and film strength**

When evaluating fracture energy  $\Gamma$  and film strength  $\sigma_{str}$ , the mismatch strain  $\Delta\varepsilon$  was used as one of the parameters that control the fracture behavior in the pre-bending condition. In the energy criterion, it is assumed that the cracks begin to develop if the change in strain energy due to cracking of the film is in equilibrium with the energy required for film cracking. The fracture energy of the film can be written as,<sup>1-3</sup>

$$\Gamma = \frac{3(f_1\varepsilon_c + f_2\Delta\varepsilon)^2 f_3 f_4 + 2\Delta\varepsilon(f_1\varepsilon_c + f_2\Delta\varepsilon)f_5}{4\kappa} E'_f \quad (S1)$$

where  $f_1, f_2, f_3, f_4, f_5$  and  $\kappa$  are the parameters considering the Young's modulus, Poisson's ratio, biaxial modulus ratio and thickness ratio of the ZnO:Al film and PES substrate.<sup>1,4</sup> The parameters are given by the following specific equations:

$$f_1 = \frac{(1 + \Sigma\eta^3) \left[ (1 - \nu_s)(1 + \nu_f) + \Sigma\eta(1 - \nu_f\nu_s) \right]}{(1 + 3\Sigma\eta^2 + 4\Sigma\eta^3 + \Sigma\eta + \Sigma^2\eta^4)(1 + \nu_f)} \quad (S2)$$

$$f_2 = -\frac{(1 + \Sigma\eta^3)}{(1 + 3\Sigma\eta^2 + 4\Sigma\eta^3 + \Sigma\eta + \Sigma^2\eta^4)} \quad (S3)$$

$$f_3 = \frac{(1 + \nu_f)(1 - 2\nu_f\nu_s + \nu_s^2)}{(1 - \nu_f\nu_s)^2} \quad (S4)$$

$$f_4 = 1 + 3 \left[ \frac{\Sigma\eta^2(1 + \eta)}{(1 + \Sigma\eta^3)} \right]^2 \quad (S5)$$

and

$$f_5 = \frac{2\nu_s(1 + \nu_s)(1 - \nu_f^2)}{(1 - \nu_f\nu_s)^2} \quad (S6)$$

The parameters  $f_1, f_2, f_3, f_4, f_5$  and  $\kappa$  are obtained as being 0.79, -0.85, 1.44, 1.00, 0.49 and 1.46, respectively. The parameter  $E'_f$  is given by the relation of  $E'_f = E_f/(1 - \nu_f^2)$  where  $E_f$  and  $\nu_f$  are the Young's modulus and Poisson's ratio (0.35) of ZnO film, respectively.<sup>5-7</sup> The values

of  $\Delta\varepsilon$  were estimated from the compressive stresses obtained from XRD measurements as 0.014, 0.016 and 0.019 for the films grown with a pre-bending strain of 0.70 %, 0.99 % and 1.21 %, respectively.

Similarly, film strength,  $\sigma_{str}$ , was quantitatively expressed using the several parameters given in Eq. (S1) with the assumption in which the cracks occur when the film center stress reaches the film strength.<sup>1</sup> The  $\sigma_{str}$  is given by<sup>1</sup>

$$\sigma_{str} = E'_f (f_1 \varepsilon_c + f_2 \Delta\varepsilon) \quad (S7)$$

The plots of all the resultant values of fracture energy  $\Gamma$  and film strength  $\sigma_{str}$  as a function of pre-bending strain are given in Fig. 3(c,d) of the main text.

## References

- (1) Zhang, X. C.; Liu, C. J.; Xuan, F. Z.; Wang, Z. D.; Tu, S. T. Effect of Residual Stresses on The Strength and Fracture Energy of The Brittle Film: Multiple Cracking Analysis. *Comput. Mater. Sci.* **2010**, 50, 246-252.
- (2) Hsueh C. H.; Yanaka, M. Multiple Film Cracking in Film/Substrate Systems with Residual Stresses and Unidirectional Loading. *J. Mater. Sci.* **2003**, 38, 1809-1817.
- (3) Hsueh C. H.; Wereszczak, A. A. Multiple Cracking of Brittle Coatings on Strained Substrates. *J. Appl. Phys.* **2004**, 96, 3501-3506.
- (4) Khang, D. Y.; Jiang, H.; Huang, Y.; Rogers, J. A. A Stretchable Form of Single-Crystal Silicon for High-Performance Electronics on Rubber Substrates. *Science* **2006**, 311, 208-212.
- (5) Mohanty, B. C.; Choi, H. R.; Choi, Y. M.; Cho, Y. S. Thickness-Dependent Fracture Behaviour of Flexible ZnO:Al Thin Films. *J. Phys. D: Appl. Phys.* **2010**, 44, 025401.
- (6) Ni, J. L.; Zhu, X. F.; Pei, Z. L.; Gong, J.; Sun, C.; Zhang, G. P. Comparative Investigation of Fracture Behaviour of Aluminium-Doped ZnO Films on a Flexible Substrate. *J. Phys. D: Appl. Phys.* **2009**, 42, 175404.
- (7) Mohanty, B. C.; Jo, Y. H.; Yeon, D. H.; Choi, I. J.; Cho, Y. S. Stress-Induced Anomalous Shift of Optical Band Gap in ZnO:Al Thin Films. *Appl. Phys. Lett.* **2009**, 95, 062103.
